# Supplementary material for: Potential therapeutic role of antagomiR17 for the treatment of chronic lymphocytic leukemia
Source: PubMed Central journal article supplement (PMC4210490; doi:10.1186/s13045-014-0079-z), 2014-10-23

Figure S1

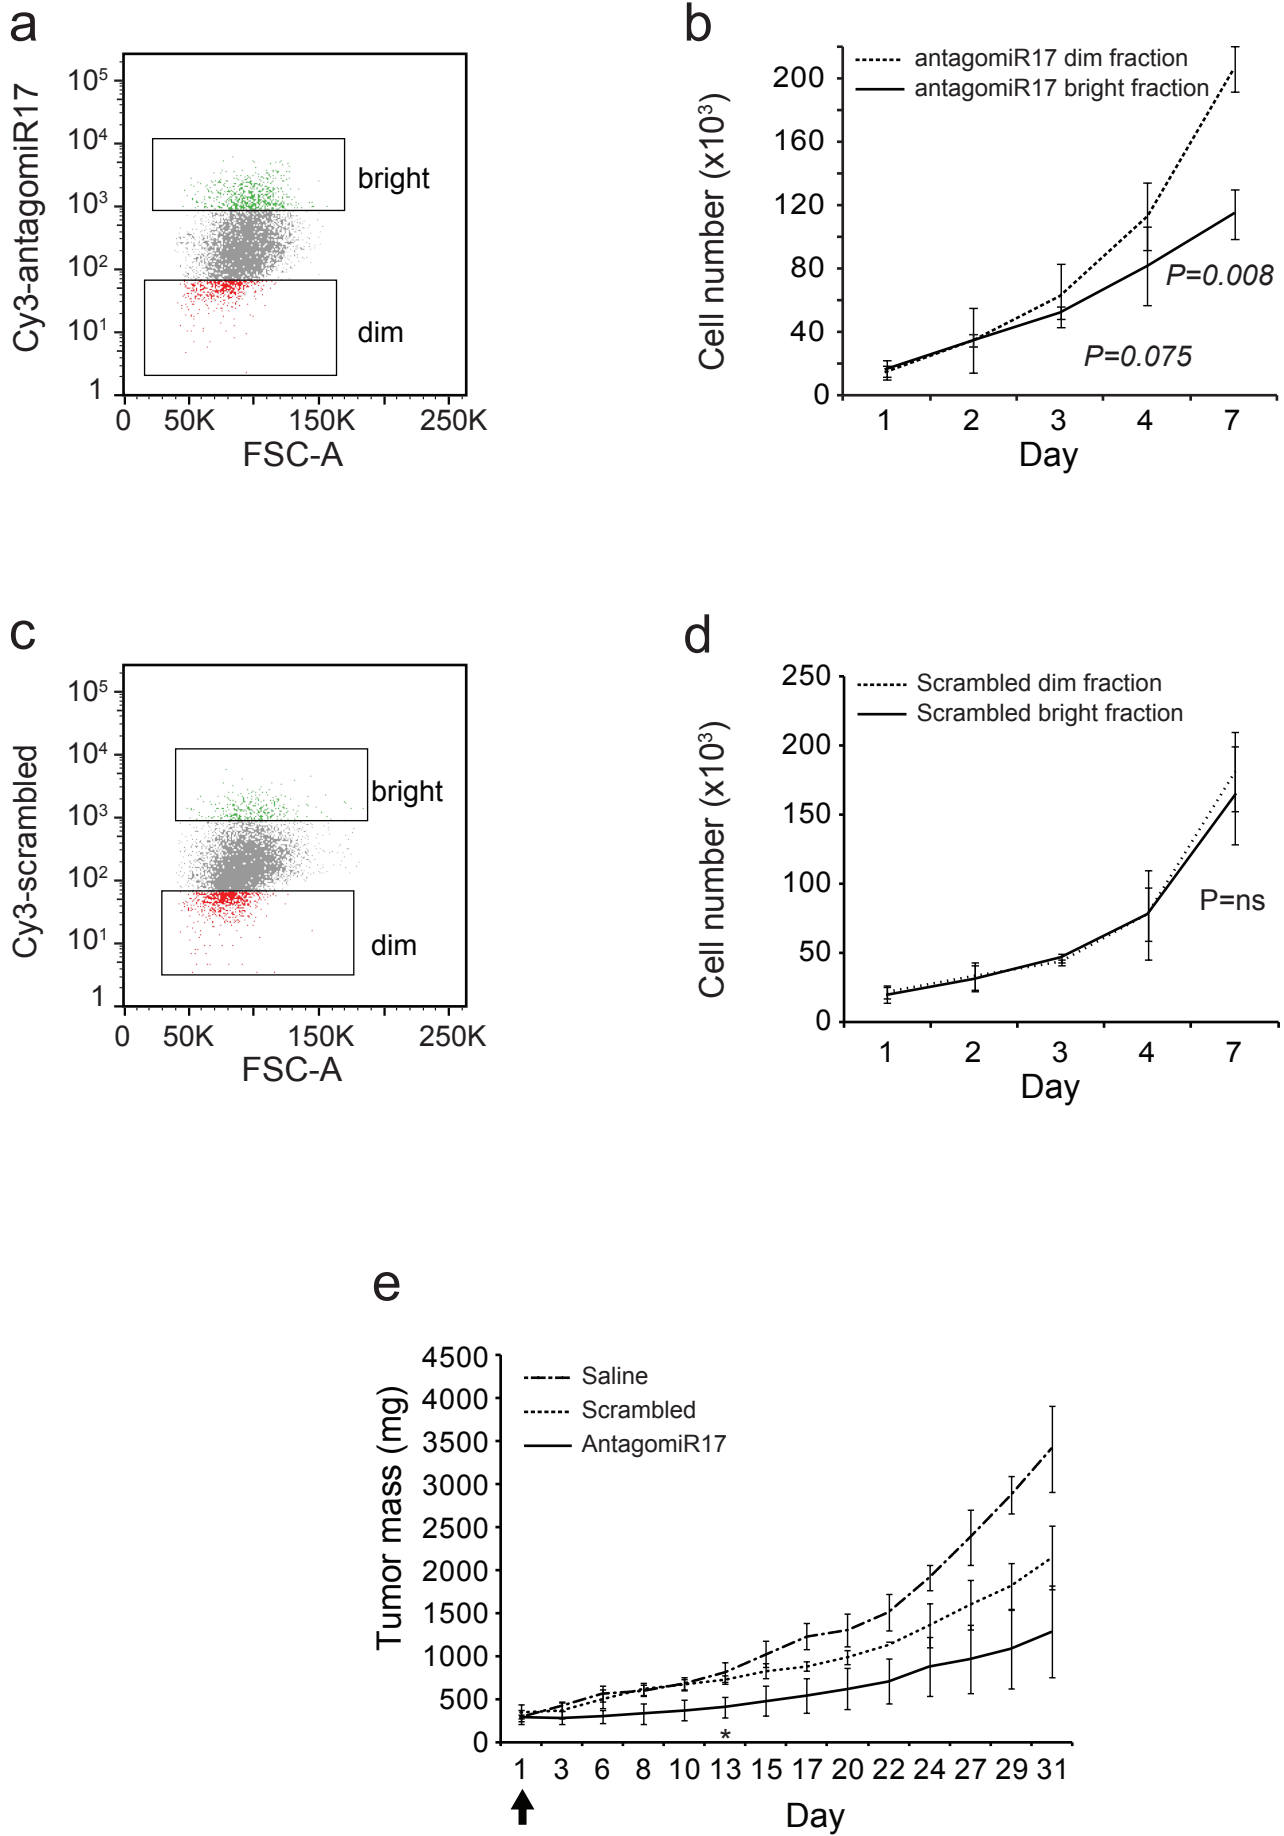

Supplement: 13045_2014_79_MOESM2_ESM.pdf [file 13045_2014_79_MOESM2_ESM.pdf]
